# Supplementary material
Source: publisher figshare collection journal article supplement (https://acs.figshare.com/ndownloader/files/7284146)
Supplement: Supplementary file 1 [file 7284146]

## Supporting Information

### **Superhydrophobic copper surfaces with anti-corrosion properties fabricated by solventless CVD methods**

Ignasi Vilaró<sup>1</sup>, Jose L. Yagüe<sup>1\*</sup> and Salvador Borrós<sup>1,2\*</sup>

<sup>1</sup>Grup d'Enginyeria de Materials (GEMAT), IQS-School of Engineering, Ramon Llull University, Via Augusta 390, 08017 Barcelona, Spain

<sup>2</sup>Centro de Investigación Biomédica en Red en Bioingeniería, Biomateriales y Nanomedicina (CIBER-BBN), 50018 Zaragoza, Spain

\*Corresponding author: [jose.yague@iqs.url.edu](mailto:jose.yague@iqs.url.edu), [salvador.borros@iqs.url.edu](mailto:salvador.borros@iqs.url.edu)

Address: Via Augusta 390, 08017 Barcelona, Spain. Phone: +34 932 672 000 Fax: +34 932 056 266

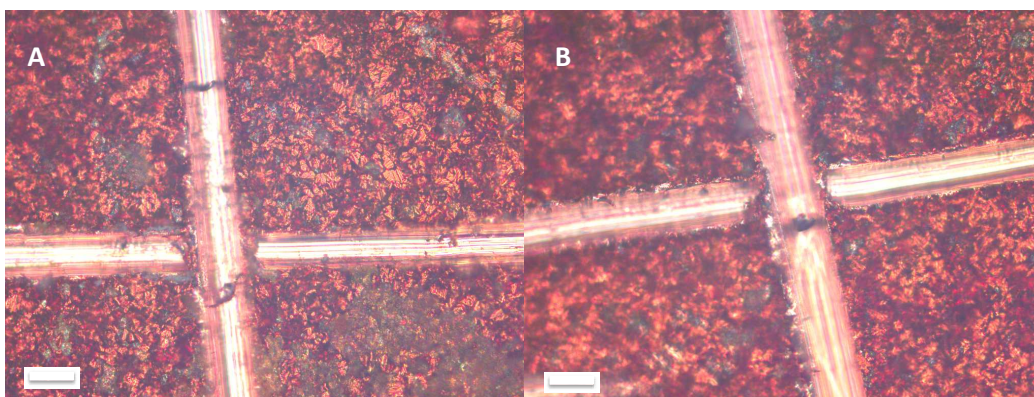

Figure S1. Pictures of iCVD coated plasma etched copper before (A) and after (B) removal of the scotch tape during the adhesion test. The test was conducted according to ASTM D 3359. There is no evidence of flakes or coating peeling off after the test, thus the adhesion between coating and substrate was classified as 5B, very good adhesion. Both scale bars correspond to 50  $\mu\text{m}$ .

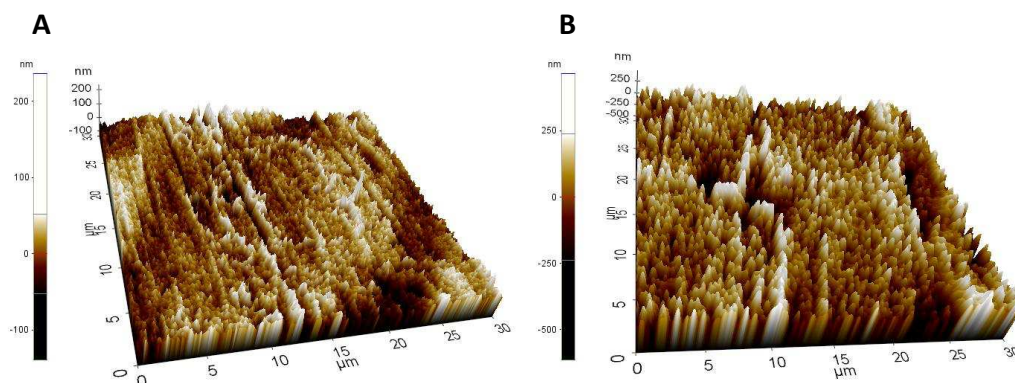

Figure S2. 3D AFM images (30x30 μm) of copper surfaces after different plasma treatments. In image A, the sample was treated with Ar plasma at 100 W for 5 min. In comparison to bare copper (Figure 3a), the plasma treatment led to a planarization of the surface and the appearance of nanoroughness due to the ion bombardment, resulting in a roughness of 27 nm. In image B, the sample was treated with a mix of Ar-O<sub>2</sub> plasma (ratio 1 to 2) at 100 W for 20 min. The surface displays more pronounced features and higher roughness (122 nm) than image A probably due to a longer exposure to plasma conditions. In general, these conditions were not enough to achieve a microstructure similar to that obtained using wet etching (Figure 3b).

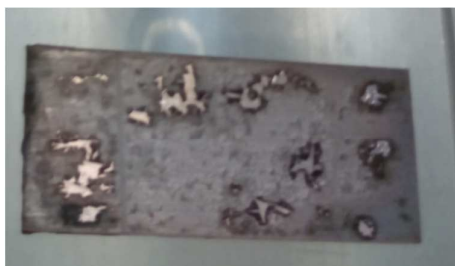

Figure S3. Image of a copper sample after exposure to  $O_2$  plasma at 150 W for 5 minutes. A dark layer of copper oxide was formed after the  $O_2$  plasma. The bright spots observed correspond to the copper substrate where the oxide layer was peeled off. The oxide layer was easily removed because of the poor adhesion with the substrate.

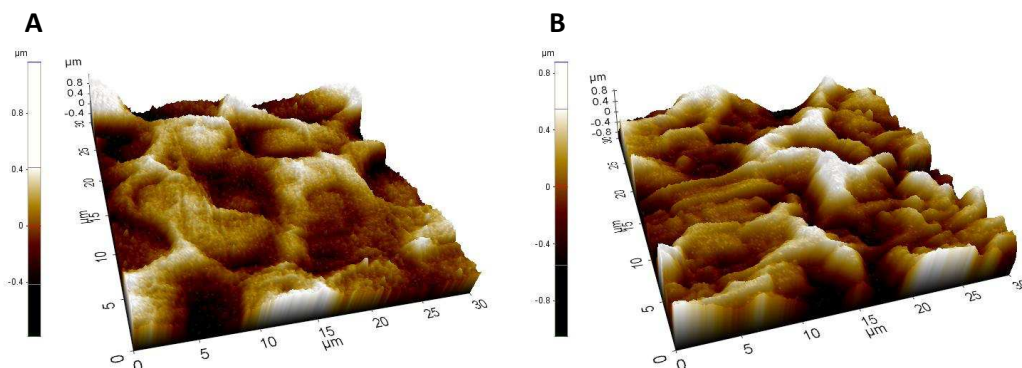

Figure S4. 3D AFM images (30x30  $\mu\text{m}$ ) of copper after the first  $\text{O}_2$  plasma treatment (A) and after the first cycle of  $\text{O}_2$  and Ar plasma (B). The raise in roughness from 40 nm, corresponding to bare copper, to 212 nm, after the  $\text{O}_2$  plasma, proves the effectiveness of the plasma treatment to modify the copper surface. In addition, the posterior Ar plasma increases the roughness to 279 nm as a result of the sputtering effect of the plasma. The removal of part of the oxide layer prevents the peeling of the oxide, and thus, enhances the adhesion with the substrate layer. A second plasma cycle results in a roughness of 430 nm, with a structure comparable to the one obtained by wet etching (Figure 3).
